# Supplementary material for: Reaction rate constant: a theoretical description from local temperature
Source: Royal Society of Chemistry journal article supplement (doi:10.1039/d4cp01251h), 2024-01-01
Supplement: d4cp01251h1.pdf [file d4cp01251h1.pdf]

Supporting Information for the paper entitled:

**Reaction Rate Constant: A Theoretical Description from Local Temperature**

Saba Valatoon and Mojtaba Alipour\*

*Department of Chemistry, School of Science, Shiraz University, Shiraz 71946-84795, Iran*

**\* Corresponding Author.**

**E-mail:** malipour@shirazu.ac.ir.

**Fax:** +98 71 36460788.

**Phone:** +98 71 36137160.

---

**Table S1.** The computed values of the local temperature at the phenoxide oxygen using different approximate KEDs for all the considered phenol derivatives under study. The reference values of  $\log_{10}(k_X/k_H)$  for all the systems are also provided. Also given in the last row as boldface are the Pearson correlation coefficients ( $R$ ) for the correlation between the KEDs-based local temperature expressions and the reference values of the relative rate constants.

| X                       | $\log_{10}(k_X/k_H)$ | $T^{TF}(r)$    | $T^W(r)$         |
|-------------------------|----------------------|----------------|------------------|
| 2-Cl                    | -0.611               | 84.90076611    | 0.00005549283919 |
| 2-CN                    | -1.687               | 84.90339987    | 0.00005540859053 |
| 2-COMe                  | -1.863               | 84.90031295    | 0.00005317402640 |
| 2-F                     | -0.396               | 84.89916320    | 0.00005553261653 |
| 2-Me                    | 0.164                | 84.89670623    | 0.00005187213542 |
| 2-NO <sub>2</sub>       | -2.930               | 84.91310458    | 0.00005796557669 |
| 2-OMe                   | -0.490               | 84.89881635    | 0.00005461297115 |
| 2-OMe,4-COMe            | -1.554               | 84.90771351    | 0.00005558791203 |
| 2-OMe,4-Me              | -0.175               | 84.89835067    | 0.00005472507408 |
| 2-OMe,4-NO <sub>2</sub> | -3.356               | 84.91198317    | 0.00005641776510 |
| 3-Cl                    | -0.518               | 84.89948954    | 0.00005300039318 |
| 3-CN                    | -0.956               | 84.89999512    | 0.00005376783229 |
| 3-COMe                  | -0.426               | 84.89888996    | 0.00005316478053 |
| 3-F                     | -0.663               | 84.89829473    | 0.00005266656796 |
| 3-Me                    | 0.412                | 84.89707270    | 0.00005187616564 |
| 3-Me,4-NO <sub>2</sub>  | -2.518               | 84.90912070    | 0.00005380816169 |
| 3-NO <sub>2</sub>       | -0.996               | 84.90025629    | 0.00005414394411 |
| 3-OMe                   | 0.160                | 84.89719392    | 0.00005202142427 |
| 3-OMe,5-Cl              | -0.420               | 84.89959343    | 0.00005324362493 |
| 4-Cl                    | -0.111               | 84.89796939    | 0.00005294272978 |
| 4-CN                    | -1.578               | 84.90394834    | 0.00005336954402 |
| 4-COMe                  | -1.246               | 84.90539582    | 0.00005297348867 |
| 4-CONH <sub>2</sub>     | -1.629               | 84.90392673    | 0.00005294496025 |
| 4-F                     | -0.001               | 84.89605802    | 0.00005268185225 |
| 4-Me                    | 0.216                | 84.89647952    | 0.00005201301837 |
| 4-NO <sub>2</sub>       | -2.687               | 84.90941491    | 0.00005382524224 |
| 4-OMe                   | 0.226                | 84.89515088    | 0.00005237260757 |
| 2,4-Cl                  | -1.196               | 84.90180509    | 0.00005635103384 |
| 2,4-NO <sub>2</sub>     | -5.189               | 84.91876067    | 0.00005923601225 |
| 3,5-Cl                  | -1.164               | 84.90193361    | 0.00005408160132 |
| 3,5-Me                  | 0.200                | 84.89671706    | 0.00005186675510 |
| 3,5-OMe                 | 0.267                | 84.89728330    | 0.00005230894993 |
| H                       | 0.000                | 84.89700193    | 0.00005186117094 |
| <b>R</b>                |                      | <b>-0.9615</b> | <b>-0.7629</b>   |

**Table S1.** Continued.

| X                       | $T^{GEA2}(r)$  | $T^{TF5W}(r)$  | $T^{TFvW}(r)$  | $T^{TF9W}(r)$  |
|-------------------------|----------------|----------------|----------------|----------------|
| 2-Cl                    | 84.90077228    | 84.90077721    | 84.90082160    | 84.90077269    |
| 2-CN                    | 84.90340603    | 84.90341095    | 84.90345528    | 84.90340644    |
| 2-COMe                  | 84.90031886    | 84.90032358    | 84.90036612    | 84.90031925    |
| 2-F                     | 84.89916937    | 84.89917431    | 84.89921873    | 84.89916978    |
| 2-Me                    | 84.89671199    | 84.89671660    | 84.89675810    | 84.89671238    |
| 2-NO <sub>2</sub>       | 84.91311102    | 84.91311617    | 84.91316255    | 84.91311145    |
| 2-OMe                   | 84.89882242    | 84.89882727    | 84.89887096    | 84.89882283    |
| 2-OMe,4-COMe            | 84.90771968    | 84.90772462    | 84.90776909    | 84.90772010    |
| 2-OMe,4-Me              | 84.89835675    | 84.89836161    | 84.89840539    | 84.89835716    |
| 2-OMe,4-NO <sub>2</sub> | 84.91198944    | 84.91199446    | 84.91203959    | 84.91198986    |
| 3-Cl                    | 84.89949543    | 84.89950014    | 84.89954254    | 84.89949583    |
| 3-CN                    | 84.90000109    | 84.90000587    | 84.90004889    | 84.90000149    |
| 3-COMe                  | 84.89889587    | 84.89890060    | 84.89894313    | 84.89889627    |
| 3-F                     | 84.89830059    | 84.89830527    | 84.89834740    | 84.89830098    |
| 3-Me                    | 84.89707846    | 84.89708308    | 84.89712458    | 84.89707885    |
| 3-Me,4-NO <sub>2</sub>  | 84.90912668    | 84.90913146    | 84.90917451    | 84.90912708    |
| 3-NO <sub>2</sub>       | 84.90026230    | 84.90026711    | 84.90031043    | 84.90026271    |
| 3-OMe                   | 84.89719970    | 84.89720432    | 84.89724594    | 84.89720009    |
| 3-OMe,5-Cl              | 84.89959935    | 84.89960408    | 84.89964668    | 84.89959974    |
| 4-Cl                    | 84.89797527    | 84.89797998    | 84.89802233    | 84.89797566    |
| 4-CN                    | 84.90395427    | 84.90395902    | 84.90400171    | 84.90395467    |
| 4-COMe                  | 84.90540170    | 84.90540641    | 84.90544879    | 84.90540210    |
| 4-CONH <sub>2</sub>     | 84.90393262    | 84.90393732    | 84.90397968    | 84.90393301    |
| 4-F                     | 84.89606387    | 84.89606855    | 84.89611070    | 84.89606426    |
| 4-Me                    | 84.89648530    | 84.89648992    | 84.89653153    | 84.89648569    |
| 4-NO <sub>2</sub>       | 84.90942089    | 84.90942567    | 84.90946873    | 84.90942129    |
| 4-OMe                   | 84.89515670    | 84.89516136    | 84.89520326    | 84.89515709    |
| 2,4-Cl                  | 84.90181135    | 84.90181636    | 84.90186144    | 84.90181177    |
| 2,4-NO <sub>2</sub>     | 84.91876725    | 84.91877252    | 84.91881991    | 84.91876770    |
| 3,5-Cl                  | 84.90193962    | 84.90194443    | 84.90198770    | 84.90194003    |
| 3,5-Me                  | 84.89672282    | 84.89672743    | 84.89676893    | 84.89672321    |
| 3,5-OMe                 | 84.89728912    | 84.89729377    | 84.89733561    | 84.89728950    |
| H                       | 84.89700769    | 84.89701230    | 84.89705379    | 84.89700808    |
| <b>R</b>                | <b>-0.9615</b> | <b>-0.9615</b> | <b>-0.9615</b> | <b>-0.9615</b> |

**Table S1.** Continued.

| X                       | $T^{TF-N}(r)$ | $T^{Pear}(r)$  | $T^{DK\ Pade}(r)$ | $T^{LLP}(r)$   |
|-------------------------|---------------|----------------|-------------------|----------------|
| 2-Cl                    | 90.50432657   | 84.90077228    | 84.90077228       | 84.90077505    |
| 2-CN                    | 90.60423841   | 84.90340603    | 84.90340603       | 84.90340880    |
| 2-COMe                  | 90.37065002   | 84.90031886    | 84.90031886       | 84.90032152    |
| 2-F                     | 90.70456762   | 84.89916937    | 84.89916937       | 84.89917215    |
| 2-Me                    | 90.70194263   | 84.89671199    | 84.89671199       | 84.89671458    |
| 2-NO <sub>2</sub>       | 90.38426584   | 84.91311102    | 84.91311102       | 84.91311392    |
| 2-OMe                   | 90.50224813   | 84.89882242    | 84.89882242       | 84.89882515    |
| 2-OMe,4-COMe            | 90.08007229   | 84.90771968    | 84.90771968       | 84.90772246    |
| 2-OMe,4-Me              | 90.32709324   | 84.89835675    | 84.89835675       | 84.89835949    |
| 2-OMe,4-NO <sub>2</sub> | 90.08460205   | 84.91198944    | 84.91198944       | 84.91199226    |
| 3-Cl                    | 90.50296575   | 84.89949543    | 84.89949543       | 84.89949808    |
| 3-CN                    | 90.60060505   | 84.90000109    | 84.90000109       | 84.90000378    |
| 3-COMe                  | 90.36913534   | 84.89889587    | 84.89889587       | 84.89889853    |
| 3-F                     | 90.70363976   | 84.89830059    | 84.89830059       | 84.89830322    |
| 3-Me                    | 90.70233417   | 84.89707846    | 84.89707846       | 84.89708106    |
| 3-Me,4-NO <sub>2</sub>  | 90.22178951   | 84.90912668    | 84.90912668       | 84.90912937    |
| 3-NO <sub>2</sub>       | 90.37058970   | 84.90026230    | 84.90026230       | 84.90026501    |
| 3-OMe                   | 90.50051861   | 84.89719970    | 84.89719970       | 84.89720230    |
| 3-OMe,5-Cl              | 90.17507453   | 84.89959935    | 84.89959935       | 84.89960201    |
| 4-Cl                    | 90.50134526   | 84.89797527    | 84.89797527       | 84.89797792    |
| 4-CN                    | 90.60482371   | 84.90395427    | 84.90395427       | 84.90395694    |
| 4-COMe                  | 90.37606039   | 84.90540170    | 84.90540170       | 84.90540435    |
| 4-CONH <sub>2</sub>     | 90.37449665   | 84.90393262    | 84.90393262       | 84.90393526    |
| 4-F                     | 90.70125010   | 84.89606387    | 84.89606387       | 84.89606651    |
| 4-Me                    | 90.70170043   | 84.89648530    | 84.89648530       | 84.89648790    |
| 4-NO <sub>2</sub>       | 90.38033844   | 84.90942089    | 84.90942089       | 84.90942358    |
| 4-OMe                   | 90.49834073   | 84.89515670    | 84.89515670       | 84.89515932    |
| 2,4-Cl                  | 90.17742362   | 84.90181135    | 84.90181135       | 84.90181417    |
| 2,4-NO <sub>2</sub>     | 89.99637417   | 84.91876725    | 84.91876725       | 84.91877022    |
| 3,5-Cl                  | 90.17756013   | 84.90193962    | 84.90193962       | 84.90194233    |
| 3,5-Me                  | 90.50001028   | 84.89672282    | 84.89672282       | 84.89672542    |
| 3,5-OMe                 | 90.17262086   | 84.89728912    | 84.89728912       | 84.89729173    |
| H                       | 90.94022463   | 84.89700769    | 84.89700769       | 84.89701028    |
| <b>R</b>                | <b>0.5783</b> | <b>-0.9615</b> | <b>-0.9615</b>    | <b>-0.9615</b> |

**Table S1.** Continued.

| X                       | $T^{OL1}(r)$   | $T^{OL2}(r)$   | $T^{Thak}(r)$  | $T^{B86A}(r)$  |
|-------------------------|----------------|----------------|----------------|----------------|
| 2-Cl                    | 84.90154734    | 84.91077190    | 84.87139060    | 84.90077400    |
| 2-CN                    | 84.90418052    | 84.91339833    | 84.87404586    | 84.90340775    |
| 2-COMe                  | 84.90107756    | 84.91011046    | 84.87154830    | 84.90032051    |
| 2-F                     | 84.89994471    | 84.90917242    | 84.86977761    | 84.89917110    |
| 2-Me                    | 84.89746133    | 84.90638455    | 84.86829114    | 84.89671360    |
| 2-NO <sub>2</sub>       | 84.91390322    | 84.92332832    | 84.88308986    | 84.91311282    |
| 2-OMe                   | 84.89959131    | 84.90874354    | 84.86967136    | 84.89882412    |
| 2-OMe,4-COMe            | 84.90849544    | 84.91772815    | 84.87831201    | 84.90772141    |
| 2-OMe,4-Me              | 84.89912642    | 84.90828786    | 84.86917633    | 84.89835845    |
| 2-OMe,4-NO <sub>2</sub> | 84.91277099    | 84.92207145    | 84.88236573    | 84.91199120    |
| 3-Cl                    | 84.90025288    | 84.90927122    | 84.87077132    | 84.89949708    |
| 3-CN                    | 84.90076401    | 84.90984638    | 84.87107283    | 84.90000277    |
| 3-COMe                  | 84.89965450    | 84.90868655    | 84.87012802    | 84.89889752    |
| 3-F                     | 84.89905565    | 84.90804593    | 84.86966592    | 84.89830222    |
| 3-Me                    | 84.89782783    | 84.90675142    | 84.86865647    | 84.89708008    |
| 3-Me,4-NO <sub>2</sub>  | 84.90988993    | 84.91897613    | 84.88018615    | 84.90912835    |
| 3-NO <sub>2</sub>       | 84.90102789    | 84.91014146    | 84.87123453    | 84.90026399    |
| 3-OMe                   | 84.89795012    | 84.90688599    | 84.86873851    | 84.89720132    |
| 3-OMe,5-Cl              | 84.90035854    | 84.90939722    | 84.87081038    | 84.89960100    |
| 4-Cl                    | 84.89873230    | 84.90774573    | 84.86926681    | 84.89797692    |
| 4-CN                    | 84.90471438    | 84.91376380    | 84.87513104    | 84.90395593    |
| 4-COMe                  | 84.90615899    | 84.91517539    | 84.87668376    | 84.90540335    |
| 4-CONH <sub>2</sub>     | 84.90468969    | 84.91370363    | 84.87522254    | 84.90393426    |
| 4-F                     | 84.89681903    | 84.90581048    | 84.86742549    | 84.89606551    |
| 4-Me                    | 84.89723565    | 84.90617078    | 84.86802650    | 84.89648692    |
| 4-NO <sub>2</sub>       | 84.91018426    | 84.91927190    | 84.88047579    | 84.90942256    |
| 4-OMe                   | 84.89590964    | 84.90487503    | 84.86660140    | 84.89515833    |
| 2,4-Cl                  | 84.90259239    | 84.91188687    | 84.87220669    | 84.90181310    |
| 2,4-NO <sub>2</sub>     | 84.91956812    | 84.92909451    | 84.88842307    | 84.91876910    |
| 3,5-Cl                  | 84.90270478    | 84.91181327    | 84.87292802    | 84.90194131    |
| 3,5-Me                  | 84.89747212    | 84.90639489    | 84.86830342    | 84.89672443    |
| 3,5-OMe                 | 84.89804160    | 84.90700175    | 84.86875054    | 84.89729074    |
| H                       | 84.89775695    | 84.90667926    | 84.86858975    | 84.89700930    |
| <b>R</b>                | <b>-0.9616</b> | <b>-0.9620</b> | <b>-0.9581</b> | <b>-0.9615</b> |

**Table S1.** Continued.

| X                       | $T^{B86B}(r)$  | $T^{DK87}(r)$  | $T^{PW86}(r)$  | $T^{PW91}(r)$  |
|-------------------------|----------------|----------------|----------------|----------------|
| 2-Cl                    | 84.90077427    | 84.90076880    | 84.90076899    | 84.90077022    |
| 2-CN                    | 84.90340802    | 84.90340256    | 84.90340275    | 84.90340398    |
| 2-COMe                  | 84.90032076    | 84.90031553    | 84.90031571    | 84.90031689    |
| 2-F                     | 84.89917136    | 84.89916589    | 84.89916608    | 84.89916732    |
| 2-Me                    | 84.89671385    | 84.89670874    | 84.89670892    | 84.89671007    |
| 2-NO <sub>2</sub>       | 84.91311310    | 84.91310739    | 84.91310759    | 84.91310888    |
| 2-OMe                   | 84.89882438    | 84.89881900    | 84.89881918    | 84.89882040    |
| 2-OMe,4-COMe            | 84.90772167    | 84.90771620    | 84.90771639    | 84.90771762    |
| 2-OMe,4-Me              | 84.89835871    | 84.89835332    | 84.89835351    | 84.89835472    |
| 2-OMe,4-NO <sub>2</sub> | 84.91199146    | 84.91198591    | 84.91198610    | 84.91198735    |
| 3-Cl                    | 84.89949733    | 84.89949211    | 84.89949229    | 84.89949347    |
| 3-CN                    | 84.90000302    | 84.89999773    | 84.89999791    | 84.89999910    |
| 3-COMe                  | 84.89889778    | 84.89889254    | 84.89889272    | 84.89889390    |
| 3-F                     | 84.89830247    | 84.89829729    | 84.89829746    | 84.89829864    |
| 3-Me                    | 84.89708032    | 84.89707521    | 84.89707539    | 84.89707654    |
| 3-Me,4-NO <sub>2</sub>  | 84.90912861    | 84.90912331    | 84.90912349    | 84.90912469    |
| 3-NO <sub>2</sub>       | 84.90026424    | 84.90025891    | 84.90025909    | 84.90026030    |
| 3-OMe                   | 84.89720156    | 84.89719644    | 84.89719662    | 84.89719778    |
| 3-OMe,5-Cl              | 84.89960126    | 84.89959601    | 84.89959619    | 84.89959738    |
| 4-Cl                    | 84.89797717    | 84.89797195    | 84.89797213    | 84.89797331    |
| 4-CN                    | 84.90395618    | 84.90395093    | 84.90395111    | 84.90395230    |
| 4-COMe                  | 84.90540360    | 84.90539838    | 84.90539856    | 84.90539974    |
| 4-CONH <sub>2</sub>     | 84.90393451    | 84.90392930    | 84.90392948    | 84.90393066    |
| 4-F                     | 84.89606576    | 84.89606057    | 84.89606075    | 84.89606192    |
| 4-Me                    | 84.89648716    | 84.89648204    | 84.89648222    | 84.89648338    |
| 4-NO <sub>2</sub>       | 84.90942282    | 84.90941752    | 84.90941770    | 84.90941890    |
| 4-OMe                   | 84.89515858    | 84.89515342    | 84.89515360    | 84.89515477    |
| 2,4-Cl                  | 84.90181337    | 84.90180782    | 84.90180801    | 84.90180926    |
| 2,4-NO <sub>2</sub>     | 84.91876938    | 84.91876354    | 84.91876374    | 84.91876506    |
| 3,5-Cl                  | 84.90194156    | 84.90193623    | 84.90193642    | 84.90193762    |
| 3,5-Me                  | 84.89672468    | 84.89671957    | 84.89671975    | 84.89672090    |
| 3,5-OMe                 | 84.89729099    | 84.89728584    | 84.89728602    | 84.89728718    |
| H                       | 84.89700955    | 84.89700444    | 84.89700462    | 84.89700577    |
| <b>R</b>                | <b>-0.9615</b> | <b>-0.9615</b> | <b>-0.9615</b> | <b>-0.9615</b> |

**Table S1.** Continued.

| X                       | $T^{LG94}(r)$  | $T^{ABSP}(r)$  | $T^{GR}(r)$    | $T^{GEA4}(r)$ |
|-------------------------|----------------|----------------|----------------|---------------|
| 2-Cl                    | 85.07241300    | 55.23668853    | 55.92958533    | 287.2241224   |
| 2-CN                    | 85.07492418    | 54.61369183    | 55.26687620    | 287.2221647   |
| 2-COMe                  | 85.06847121    | 56.08440194    | 56.82748381    | 287.2253718   |
| 2-F                     | 85.07086755    | 53.93010513    | 54.53733736    | 287.2272118   |
| 2-Me                    | 85.06286651    | 53.92854074    | 54.53575539    | 287.2304537   |
| 2-NO <sub>2</sub>       | 85.08839910    | 56.09285676    | 56.83605059    | 287.2081015   |
| 2-OMe                   | 85.06914703    | 55.23541913    | 55.92830001    | 287.2272385   |
| 2-OMe,4-COMe            | 85.07950902    | 57.95391011    | 58.79183337    | 287.2151616   |
| 2-OMe,4-Me              | 85.06884893    | 56.34507898    | 57.10276278    | 287.2282126   |
| 2-OMe,4-NO <sub>2</sub> | 85.08501139    | 57.95682521    | 58.79479060    | 287.2092909   |
| 3-Cl                    | 85.06738250    | 55.23585550    | 55.92874188    | 287.2246709   |
| 3-CN                    | 85.06905396    | 54.61150010    | 55.26465827    | 287.2250165   |
| 3-COMe                  | 85.06703269    | 56.08346192    | 56.82653134    | 287.2263021   |
| 3-F                     | 85.06567672    | 53.92955059    | 54.53677661    | 287.2264062   |
| 3-Me                    | 85.06323957    | 53.92877353    | 54.53599081    | 287.2285652   |
| 3-Me,4-NO <sub>2</sub>  | 85.07824997    | 57.08478072    | 57.88119116    | 287.2122631   |
| 3-NO <sub>2</sub>       | 85.06988327    | 56.08436548    | 56.82744686    | 287.2242261   |
| 3-OMe                   | 85.06358474    | 55.23436098    | 55.92722862    | 287.2281213   |
| 3-OMe,5-Cl              | 85.06785682    | 57.30642840    | 58.11409385    | 287.2247976   |
| 4-Cl                    | 85.06577286    | 55.23486643    | 55.92774039    | 287.2272334   |
| 4-CN                    | 85.07240757    | 54.61404259    | 55.26723118    | 287.2190388   |
| 4-COMe                  | 85.07325381    | 56.08775943    | 56.83088579    | 287.2170916   |
| 4-CONH <sub>2</sub>     | 85.07173971    | 56.08678894    | 56.82990245    | 287.2190745   |
| 4-F                     | 85.06346110    | 53.92812979    | 54.53533981    | 287.2299270   |
| 4-Me                    | 85.06285667    | 53.92839687    | 54.53560990    | 287.2293923   |
| 4-NO <sub>2</sub>       | 85.07857031    | 56.09041526    | 56.83357680    | 287.2115025   |
| 4-OMe                   | 85.06207936    | 55.23303213    | 55.92588310    | 287.2313821   |
| 2,4-Cl                  | 85.07472413    | 57.30792435    | 58.11561084    | 287.2229715   |
| 2,4-NO <sub>2</sub>     | 85.09589629    | 58.54767049    | 59.41098146    | 287.2005500   |
| 3,5-Cl                  | 85.07146836    | 57.30800884    | 58.11569655    | 287.2213207   |
| 3,5-Me                  | 85.06286905    | 55.23405058    | 55.92691433    | 287.2293029   |
| 3,5-OMe                 | 85.06411626    | 57.30486815    | 58.11251162    | 287.2282060   |
| H                       | 85.06314560    | 52.35809022    | 52.84930133    | 287.2282454   |
| <b>R</b>                | <b>-0.9454</b> | <b>-0.5931</b> | <b>-0.5919</b> | <b>0.9532</b> |

**Table S2.** Numerical results of the total kinetic energy (au) from integration of the accurate and approximate KEDs for the systems under study.

| X                       | H        | L        | TF       | W       | GEA2     | TF5W     | TFvW     | TF9W     |
|-------------------------|----------|----------|----------|---------|----------|----------|----------|----------|
| 2-Cl                    | 764.281  | 764.281  | 703.175  | 515.024 | 760.400  | 806.180  | 1218.200 | 764.234  |
| 2-CN                    | 397.662  | 397.662  | 360.603  | 315.571 | 395.667  | 423.718  | 676.175  | 398.016  |
| 2-COMe                  | 457.833  | 457.833  | 415.341  | 361.071 | 455.460  | 487.555  | 776.412  | 458.148  |
| 2-F                     | 404.753  | 404.753  | 367.495  | 314.291 | 402.416  | 430.353  | 681.785  | 404.756  |
| 2-Me                    | 344.819  | 344.819  | 312.804  | 273.949 | 343.243  | 367.594  | 586.753  | 345.283  |
| 2-NO <sub>2</sub>       | 509.731  | 509.731  | 462.243  | 397.430 | 506.402  | 541.729  | 859.673  | 509.361  |
| 2-OMe                   | 419.847  | 419.847  | 380.877  | 330.267 | 417.573  | 446.930  | 711.143  | 420.032  |
| 2-OMe,4-COMe            | 571.988  | 571.988  | 518.920  | 448.852 | 568.792  | 608.690  | 967.772  | 572.134  |
| 2-OMe,4-Me              | 458.964  | 458.964  | 416.367  | 361.727 | 456.559  | 488.713  | 778.095  | 459.252  |
| 2-OMe,4-NO <sub>2</sub> | 623.894  | 623.894  | 565.848  | 485.139 | 619.752  | 662.875  | 1050.986 | 623.364  |
| 3-Cl                    | 764.282  | 764.282  | 703.175  | 515.047 | 760.402  | 806.184  | 1218.222 | 764.237  |
| 3-CN                    | 397.660  | 397.660  | 360.592  | 315.589 | 395.657  | 423.709  | 676.180  | 398.006  |
| 3-COMe                  | 457.825  | 457.825  | 415.318  | 361.132 | 455.443  | 487.544  | 776.450  | 458.132  |
| 3-F                     | 404.757  | 404.757  | 367.506  | 314.299 | 402.428  | 430.366  | 681.805  | 404.768  |
| 3-Me                    | 344.819  | 344.819  | 312.802  | 273.981 | 343.245  | 367.599  | 586.784  | 345.284  |
| 3-Me,4-NO <sub>2</sub>  | 548.861  | 548.861  | 497.764  | 428.835 | 545.412  | 583.531  | 926.599  | 548.605  |
| 3-NO <sub>2</sub>       | 509.728  | 509.728  | 462.240  | 397.433 | 506.400  | 541.727  | 859.674  | 509.358  |
| 3-OMe                   | 419.851  | 419.851  | 380.891  | 330.282 | 417.589  | 446.948  | 711.174  | 420.048  |
| 3-OMe,5-Cl              | 878.434  | 878.434  | 806.760  | 602.805 | 873.739  | 927.321  | 1409.565 | 878.226  |
| 4-Cl                    | 764.278  | 764.278  | 703.167  | 515.032 | 760.392  | 806.173  | 1218.199 | 764.227  |
| 4-CN                    | 397.669  | 397.669  | 360.611  | 315.572 | 395.674  | 423.725  | 676.183  | 398.024  |
| 4-COMe                  | 457.840  | 457.840  | 415.343  | 361.121 | 455.468  | 487.567  | 776.464  | 458.156  |
| 4-CONH <sub>2</sub>     | 473.907  | 473.907  | 429.938  | 372.310 | 471.306  | 504.400  | 802.248  | 474.077  |
| 4-F                     | 404.749  | 404.749  | 367.483  | 314.295 | 402.405  | 430.342  | 681.778  | 404.745  |
| 4-Me                    | 344.816  | 344.816  | 312.793  | 273.986 | 343.236  | 367.591  | 586.779  | 345.276  |
| 4-NO <sub>2</sub>       | 509.747  | 509.747  | 462.272  | 397.408 | 506.429  | 541.754  | 859.681  | 509.387  |
| 4-OMe                   | 419.844  | 419.844  | 380.868  | 330.286 | 417.566  | 446.925  | 711.154  | 420.025  |
| 2,4-Cl                  | 1222.859 | 1222.859 | 1129.035 | 787.529 | 1216.538 | 1286.541 | 1916.564 | 1222.401 |
| 2,4-NO <sub>2</sub>     | 713.766  | 713.766  | 647.192  | 552.328 | 708.562  | 757.658  | 1199.520 | 712.674  |
| 3,5-Cl                  | 1222.864 | 1222.864 | 1129.043 | 787.558 | 1216.550 | 1286.555 | 1916.601 | 1222.413 |
| 3,5-Me                  | 383.937  | 383.937  | 348.298  | 305.441 | 382.236  | 409.386  | 653.739  | 384.510  |
| 3,5-OMe                 | 534.004  | 534.004  | 484.478  | 418.042 | 530.927  | 568.087  | 902.520  | 534.039  |
| H                       | 305.698  | 305.698  | 277.304  | 242.522 | 304.250  | 325.808  | 519.826  | 306.056  |



**Table S2.** Continued.

| X                       | TF-N     | Pear     | DK Pade  | LLP      | OL1      | OL2      | Thak     | B86A     |
|-------------------------|----------|----------|----------|----------|----------|----------|----------|----------|
| 2-Cl                    | 749.586  | 747.383  | 761.896  | 763.990  | 766.866  | 765.468  | 763.978  | 766.952  |
| 2-CN                    | 384.816  | 384.273  | 393.917  | 396.414  | 399.268  | 398.277  | 397.506  | 398.536  |
| 2-COMe                  | 442.102  | 442.584  | 453.613  | 456.382  | 459.595  | 458.465  | 457.591  | 458.799  |
| 2-F                     | 392.624  | 391.626  | 401.219  | 403.388  | 406.051  | 405.075  | 404.356  | 405.468  |
| 2-Me                    | 334.194  | 333.299  | 341.661  | 343.868  | 346.366  | 345.507  | 344.817  | 345.710  |
| 2-NO <sub>2</sub>       | 492.026  | 492.597  | 504.774  | 507.579  | 510.986  | 509.747  | 508.841  | 510.224  |
| 2-OMe                   | 406.015  | 405.858  | 415.950  | 418.444  | 421.362  | 420.330  | 419.536  | 420.651  |
| 2-OMe,4-COMe            | 550.531  | 552.961  | 566.684  | 570.015  | 573.949  | 572.548  | 571.480  | 573.010  |
| 2-OMe,4-Me              | 442.992  | 443.660  | 454.712  | 457.484  | 460.703  | 459.573  | 458.689  | 459.904  |
| 2-OMe,4-NO <sub>2</sub> | 600.318  | 603.005  | 617.871  | 621.233  | 625.357  | 623.847  | 622.751  | 624.456  |
| 3-Cl                    | 749.585  | 747.383  | 761.898  | 763.991  | 766.869  | 765.470  | 763.980  | 766.953  |
| 3-CN                    | 384.803  | 384.261  | 393.905  | 396.404  | 399.258  | 398.267  | 397.496  | 398.525  |
| 3-COMe                  | 442.078  | 442.558  | 453.593  | 456.363  | 459.579  | 458.449  | 457.573  | 458.780  |
| 3-F                     | 392.636  | 391.639  | 401.232  | 403.401  | 406.064  | 405.088  | 404.369  | 405.481  |
| 3-Me                    | 334.192  | 333.296  | 341.660  | 343.868  | 346.367  | 345.508  | 344.817  | 345.710  |
| 3-Me,4-NO <sub>2</sub>  | 528.908  | 530.434  | 543.567  | 546.647  | 550.351  | 549.014  | 548.022  | 549.505  |
| 3-NO <sub>2</sub>       | 492.024  | 492.593  | 504.772  | 507.576  | 510.983  | 509.745  | 508.838  | 510.221  |
| 3-OMe                   | 406.031  | 405.875  | 415.968  | 418.461  | 421.378  | 420.346  | 419.552  | 420.667  |
| 3-OMe,5-Cl              | 856.891  | 857.769  | 874.973  | 877.629  | 881.226  | 879.556  | 877.874  | 881.168  |
| 4-Cl                    | 749.577  | 747.375  | 761.890  | 763.982  | 766.859  | 765.460  | 763.970  | 766.943  |
| 4-CN                    | 384.824  | 384.281  | 393.926  | 396.422  | 399.275  | 398.284  | 397.514  | 398.543  |
| 4-COMe                  | 442.105  | 442.585  | 453.621  | 456.388  | 459.603  | 458.474  | 457.598  | 458.806  |
| 4-CONH <sub>2</sub>     | 457.640  | 458.145  | 469.534  | 472.310  | 475.580  | 474.417  | 473.534  | 474.798  |
| 4-F                     | 392.612  | 391.616  | 401.211  | 403.378  | 406.040  | 405.064  | 404.346  | 405.457  |
| 4-Me                    | 334.182  | 333.287  | 341.652  | 343.859  | 346.359  | 345.500  | 344.808  | 345.701  |
| 4-NO <sub>2</sub>       | 492.058  | 492.630  | 504.809  | 507.608  | 511.013  | 509.774  | 508.869  | 510.253  |
| 4-OMe                   | 406.006  | 405.851  | 415.945  | 418.437  | 421.355  | 420.323  | 419.529  | 420.644  |
| 2,4-Cl                  | 1199.191 | 1199.268 | 1220.892 | 1223.148 | 1226.703 | 1224.666 | 1222.289 | 1227.442 |
| 2,4-NO <sub>2</sub>     | 685.890  | 689.717  | 706.669  | 710.346  | 714.962  | 713.246  | 712.035  | 714.007  |
| 3,5-Cl                  | 1199.200 | 1199.277 | 1220.901 | 1223.158 | 1226.714 | 1224.678 | 1222.300 | 1227.453 |
| 3,5-Me                  | 371.286  | 371.104  | 380.428  | 382.914  | 385.714  | 384.757  | 383.976  | 384.968  |
| 3,5-OMe                 | 514.583  | 516.263  | 529.045  | 532.100  | 535.737  | 534.434  | 533.448  | 534.884  |
| H                       | 297.043  | 295.486  | 302.890  | 304.820  | 307.018  | 306.257  | 305.655  | 306.449  |

| X                       | B86B     | DK87     | PW86     | PW91     | LG94     | ABSP     | GR       | GEA4     |
|-------------------------|----------|----------|----------|----------|----------|----------|----------|----------|
| 2-Cl                    | 766.299  | 761.563  | 769.992  | 764.735  | 796.767  | 972.512  | 978.251  | 771.299  |
| 2-CN                    | 397.899  | 394.965  | 400.448  | 396.760  | 412.328  | 547.527  | 550.302  | 402.754  |
| 2-COMe                  | 458.081  | 454.726  | 460.993  | 456.783  | 474.757  | 635.441  | 639.077  | 463.567  |
| 2-F                     | 404.869  | 401.956  | 407.406  | 403.751  | 419.704  | 547.732  | 550.361  | 409.399  |
| 2-Me                    | 345.154  | 342.606  | 347.360  | 344.166  | 357.682  | 472.650  | 474.887  | 349.424  |
| 2-NO <sub>2</sub>       | 509.456  | 505.767  | 512.673  | 508.035  | 528.085  | 702.783  | 706.829  | 515.257  |
| 2-OMe                   | 419.998  | 416.930  | 422.660  | 418.813  | 435.307  | 578.066  | 581.174  | 424.985  |
| 2-OMe,4-COMe            | 572.128  | 567.959  | 575.748  | 570.519  | 593.006  | 803.042  | 808.163  | 578.855  |
| 2-OMe,4-Me              | 459.184  | 455.823  | 462.097  | 457.885  | 475.914  | 638.060  | 641.776  | 464.697  |
| 2-OMe,4-NO <sub>2</sub> | 623.525  | 619.023  | 627.449  | 621.793  | 646.357  | 871.359  | 876.943  | 630.561  |
| 3-Cl                    | 766.300  | 761.565  | 769.993  | 764.736  | 796.768  | 972.535  | 978.273  | 771.302  |
| 3-CN                    | 397.888  | 394.955  | 400.438  | 396.749  | 412.316  | 547.537  | 550.312  | 402.744  |
| 3-COMe                  | 458.062  | 454.706  | 460.974  | 456.764  | 474.736  | 635.487  | 639.122  | 463.551  |
| 3-F                     | 404.882  | 401.969  | 407.419  | 403.764  | 419.717  | 547.748  | 550.376  | 409.412  |
| 3-Me                    | 345.154  | 342.606  | 347.360  | 344.165  | 357.682  | 472.681  | 474.918  | 349.426  |
| 3-Me,4-NO <sub>2</sub>  | 548.671  | 544.689  | 552.138  | 547.136  | 568.721  | 763.484  | 768.153  | 554.992  |
| 3-NO <sub>2</sub>       | 509.453  | 505.764  | 512.669  | 508.032  | 528.081  | 702.785  | 706.831  | 515.254  |
| 3-OMe                   | 420.014  | 416.946  | 422.677  | 418.830  | 435.323  | 578.091  | 581.200  | 425.001  |
| 3-OMe,5-Cl              | 880.353  | 874.803  | 884.753  | 878.478  | 915.022  | 1147.360 | 1155.035 | 886.594  |
| 4-Cl                    | 766.291  | 761.555  | 769.984  | 764.726  | 796.758  | 972.514  | 978.253  | 771.292  |
| 4-CN                    | 397.906  | 394.973  | 400.456  | 396.767  | 412.336  | 547.533  | 550.307  | 402.761  |
| 4-COMe                  | 458.087  | 454.731  | 460.999  | 456.789  | 474.762  | 635.492  | 639.128  | 463.575  |
| 4-CONH <sub>2</sub>     | 474.064  | 470.605  | 477.070  | 472.728  | 491.353  | 656.323  | 660.086  | 479.639  |
| 4-F                     | 404.858  | 401.946  | 407.396  | 403.741  | 419.692  | 547.729  | 550.358  | 409.388  |
| 4-Me                    | 345.145  | 342.597  | 347.351  | 344.156  | 357.673  | 472.680  | 474.917  | 349.418  |
| 4-NO <sub>2</sub>       | 509.485  | 505.797  | 512.701  | 508.064  | 528.115  | 702.781  | 706.827  | 515.283  |
| 4-OMe                   | 419.991  | 416.923  | 422.654  | 418.806  | 435.298  | 578.080  | 581.188  | 424.978  |
| 2,4-Cl                  | 1226.626 | 1219.410 | 1232.057 | 1224.372 | 1276.455 | 1549.616 | 1560.357 | 1232.882 |
| 2,4-NO <sub>2</sub>     | 712.961  | 707.838  | 717.439  | 710.993  | 739.112  | 998.538  | 1005.117 | 720.815  |
| 3,5-Cl                  | 1226.637 | 1219.421 | 1232.068 | 1224.383 | 1276.466 | 1549.651 | 1560.392 | 1232.894 |
| 3,5-Me                  | 384.346  | 381.504  | 386.803  | 383.243  | 398.295  | 532.044  | 534.887  | 389.143  |
| 3,5-OMe                 | 534.068  | 530.187  | 537.438  | 532.573  | 553.579  | 745.060  | 749.669  | 540.295  |
| H                       | 305.959  | 303.705  | 307.914  | 305.085  | 317.067  | 413.542  | 415.146  | 309.706  |

**Table S2.** Continued.
